# Supplementary material for: Electrochemical characterization of plutonium in n-tributyl phosphate
Source: Royal Society of Chemistry journal article supplement (doi:10.1039/c6dt04765c), 2017-01-01
Supplement: c6dt04765c1.pdf [file c6dt04765c1.pdf]

### Supplementary Information

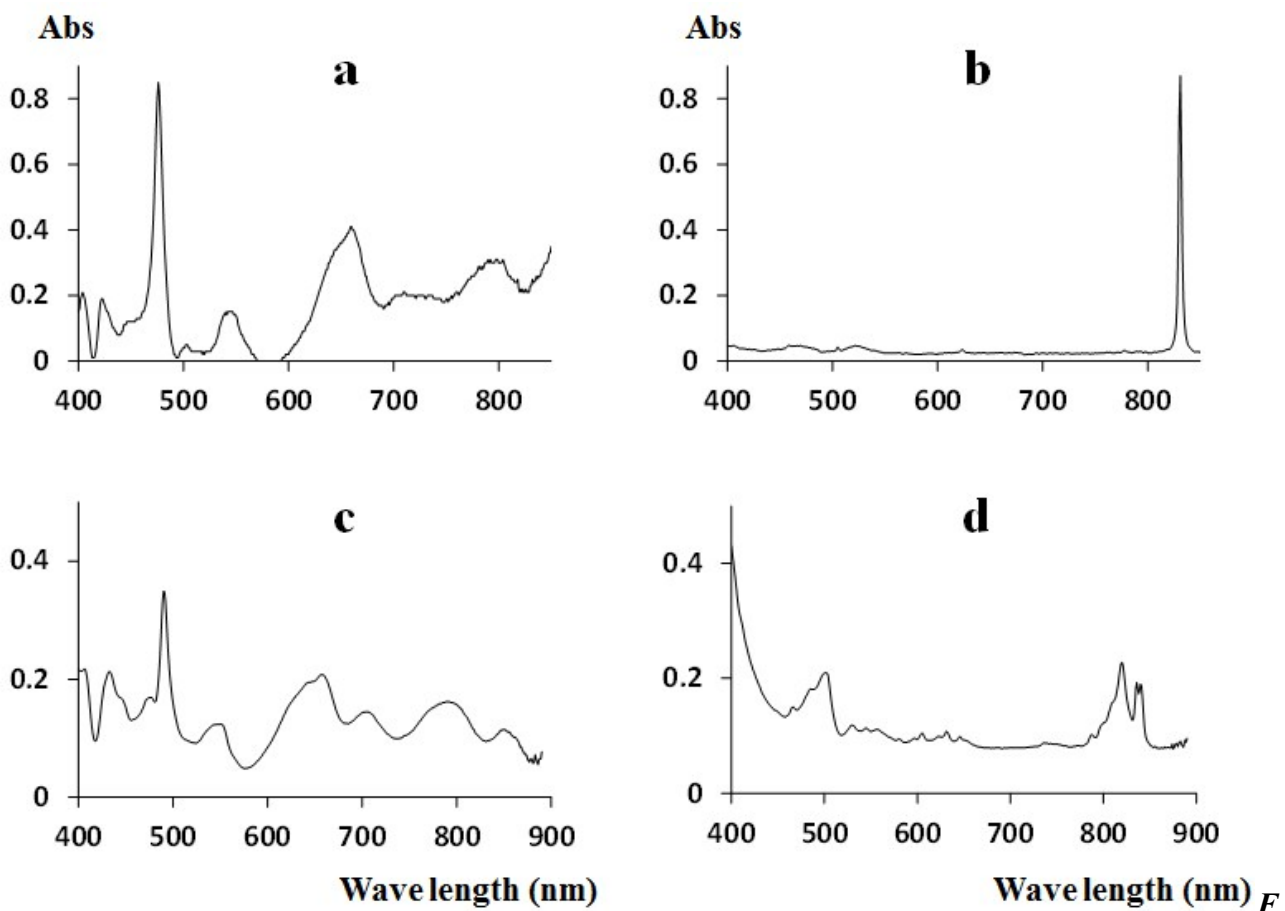

**figure S1.** Visible absorption spectra: **a, b:** Pu(IV) and Pu(VI) (both  $6.2 \text{ mmol.L}^{-1}$ ) in  $\text{HNO}_3$   $5 \text{ mol.L}^{-1}$ . **c, d:** Pu(IV) and Pu(VI) in TBP- $\text{HNO}_3$  equilibrated with  $\text{HNO}_3$   $5 \text{ mol.L}^{-1}$ .

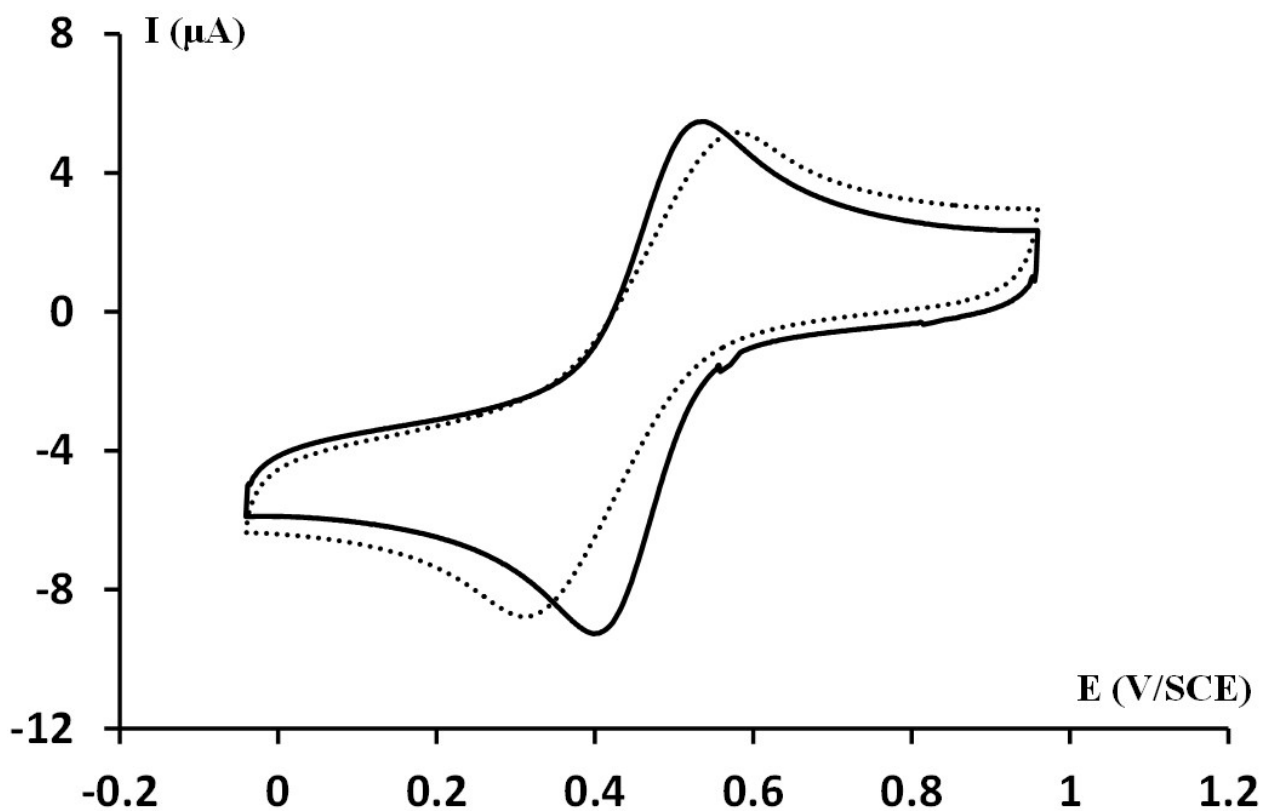

**Figure S2.** CVs of Pu(IV)  $6.11 \text{ mmol.L}^{-1}$  in TBP equilibrated with  $\text{HNO}_3$  ( $5 \text{ mol.L}^{-1}$ ) aqueous solution at a GCE electrode (area  $0.007 \text{ cm}^2$ ). Scan rate  $\nu = 750 \text{ mV.s}^{-1}$ . Dotted line: uncompensated from ohmic drop. Solid line:  $10 \text{ k}\Omega$  positive feedback compensation (corresponding to 85% of total resistance).

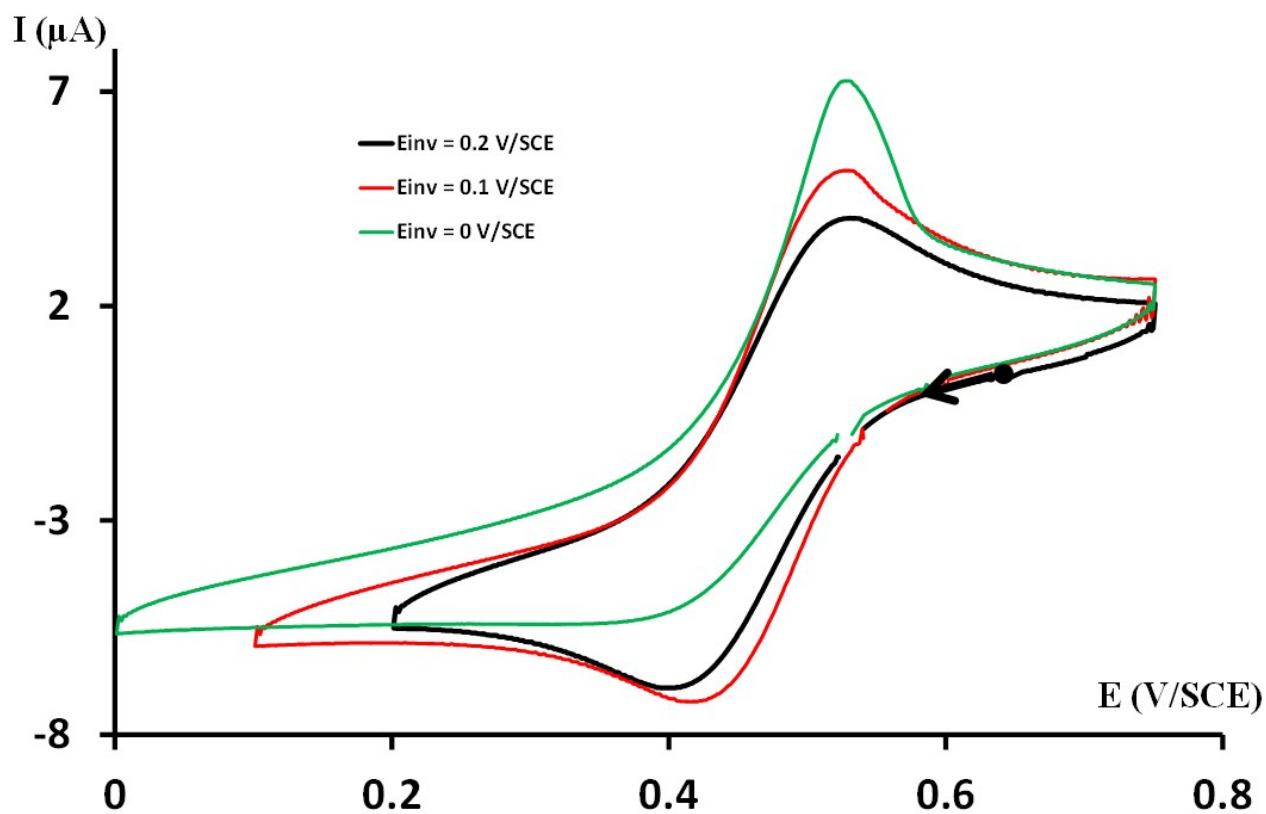

**Figure S3.** CVs with different cathodic potential limit of Pu(VI)  $5.72 \text{ mmol}\cdot\text{L}^{-1}$  in TBP equilibrated with  $\text{HNO}_3$  ( $3 \text{ mol}\cdot\text{L}^{-1}$ ) aqueous solution at a GCE electrode (area  $0.007 \text{ cm}^2$ ). Ohmic drop correction. Scan rate  $\nu = 500 \text{ mV}\cdot\text{s}^{-1}$ .
